# Supplementary material for: Construction of bimetallic oxy-hydroxides based on Ni(OH)2 nanosheets for sensitive non-enzymatic glucose detection via electrochemical oxidation and incorporation
Source: Royal Society of Chemistry journal article supplement (doi:10.1039/d4nr04342a), 2025-01-01
Supplement: d4nr04342a1.pdf [file d4nr04342a1.pdf]

*Supporting information*

**Construction of bimetallic oxy-hydroxides based on Ni(OH)<sub>2</sub> nanosheets for sensitive non-enzymatic glucose detection via electrochemical oxidation and incorporation**

*Weiji Dai,\*<sup>1</sup> Bing Wu,<sup>1</sup> Fan Zhang,<sup>1</sup> Yuxi Huang,<sup>1</sup> Cuijiao Zhao,<sup>1</sup> Yudong Zhang,<sup>1</sup> Can Cui,<sup>1</sup> Jing Guo,<sup>2</sup> Saifang Huang\*<sup>1</sup>*

<sup>1</sup> School of Materials Science and Engineering, Jiangsu University of Science and Technology, Zhenjiang 212003, China

<sup>2</sup> School of Resources and Materials, Northeastern University at Qinhuangdao, Qinhuangdao 066004, China

\*Corresponding authors.

E-mail: daiweiji@just.edu.cn (W. Dai), s.huang@just.edu.cn (S. Huang)

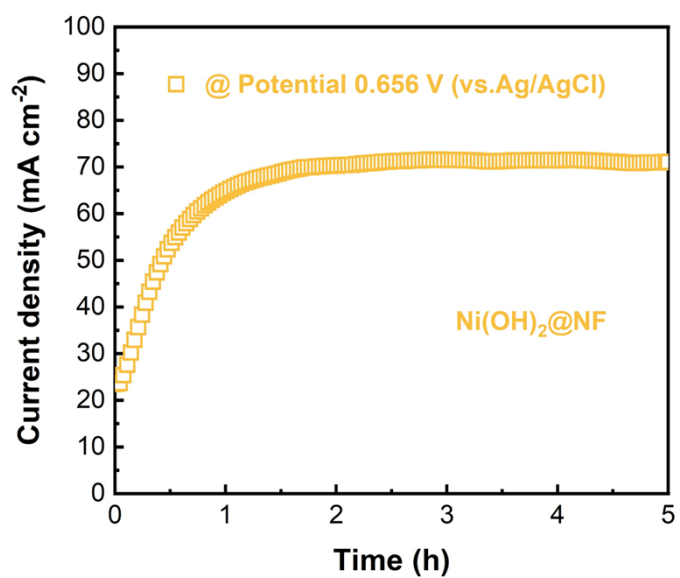

**Figure S1.** i-t curve of Ni(OH)<sub>2</sub>@NF at the potential of 0.656 V (vs. Ag/AgCl) in 1 M KOH solution.

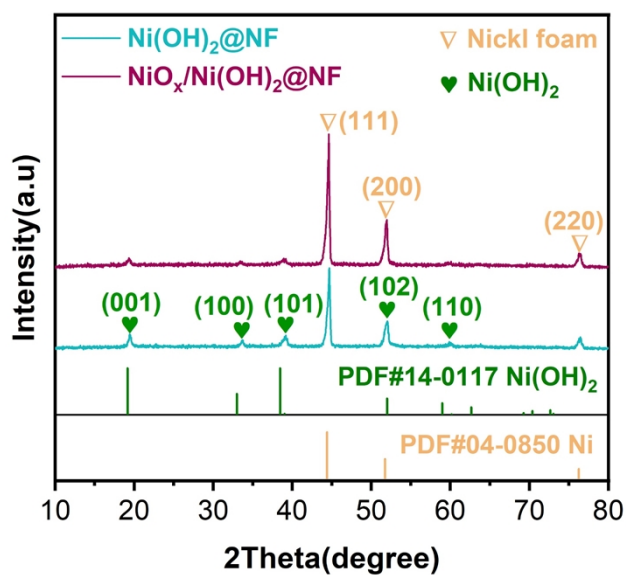

**Figure S2.** XRD pattern of Ni(OH)<sub>2</sub>@NF and NiO<sub>x</sub>/Ni(OH)<sub>2</sub>@NF.

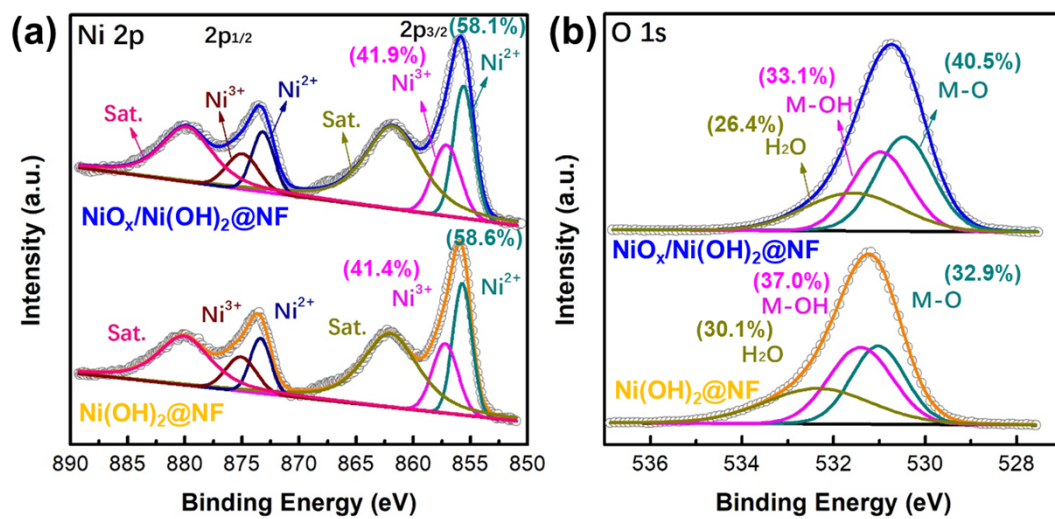

**Figure S3.** High-resolution XPS spectra: (a) Ni 2p, (b) O 1s.

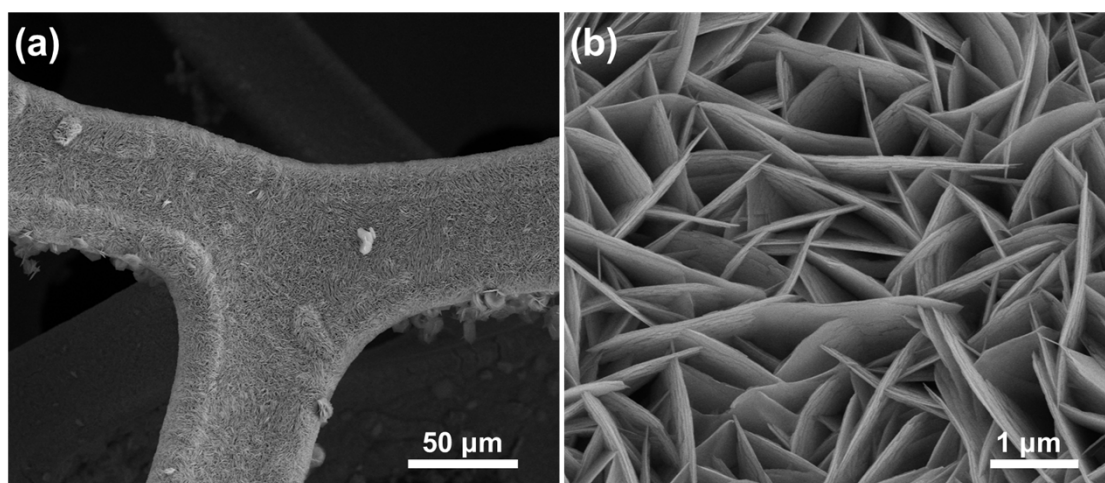

**Figure S4.** (a and b) SEM images of  $\text{Ni(OH)}_2@\text{NF}$ .

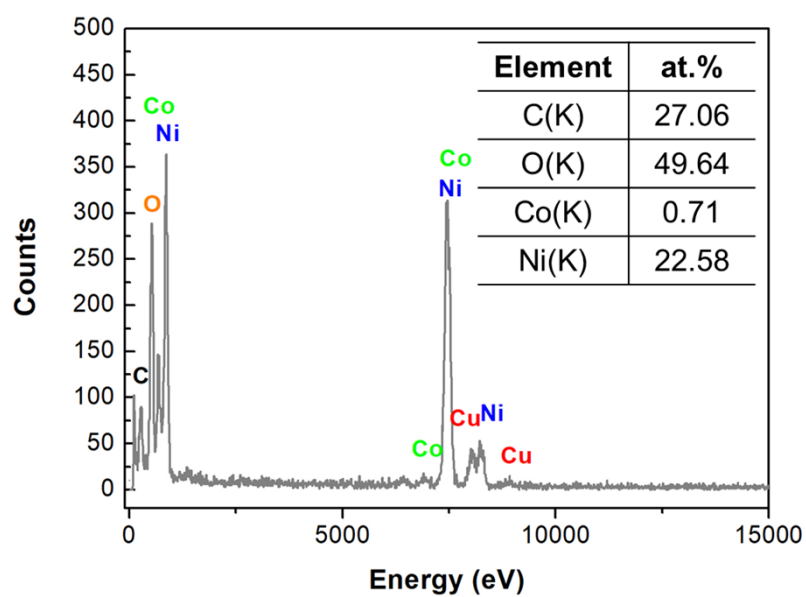

**Figure S5.** EDS pattern of  $(\text{CoNi})\text{O}_x/\text{Ni(OH)}_2@\text{NF}$ .

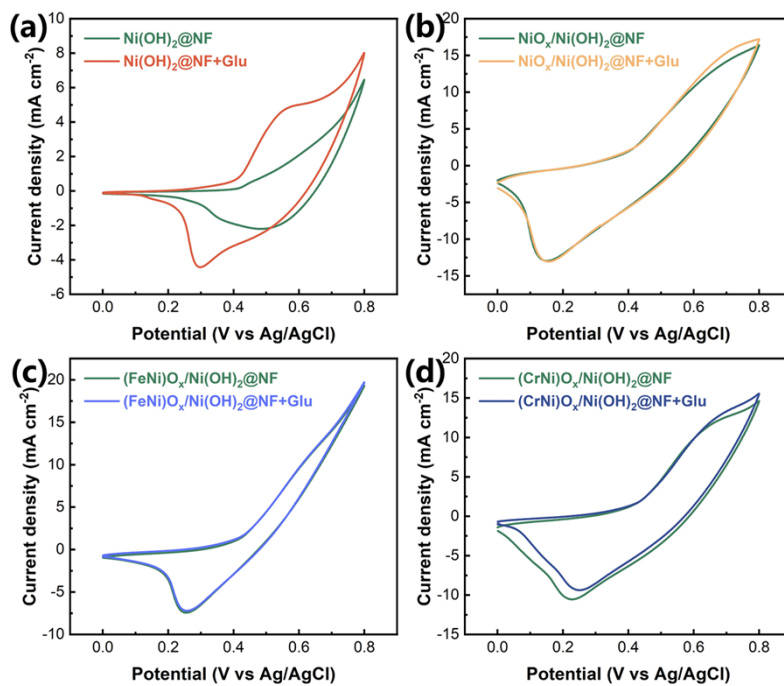

**Figure S6.** CV curves at scan rate of  $10 \text{ mV s}^{-1}$  with and without addition of  $1 \text{ mM}$  glucose: (a)  $\text{Ni(OH)}_2@\text{NF}$ , (b)  $\text{NiO}_x/\text{Ni(OH)}_2@\text{NF}$ , (c)  $(\text{FeNi})\text{O}_x/\text{Ni(OH)}_2@\text{NF}$ , and (d)  $(\text{CrNi})\text{O}_x/\text{Ni(OH)}_2@\text{NF}$ .

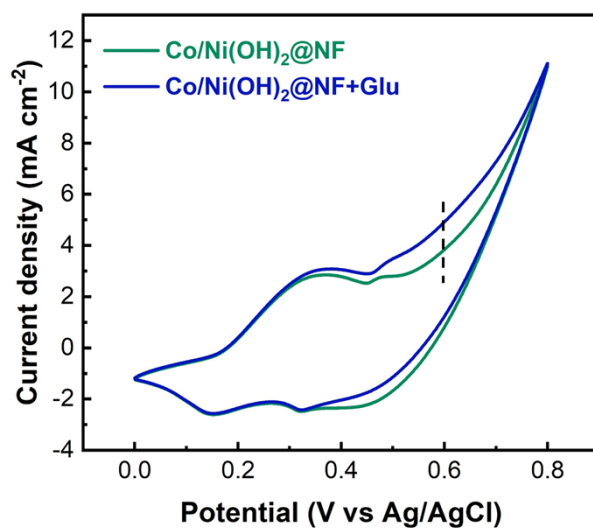

**Figure S7.** CV curves at scan rate of  $10 \text{ mV s}^{-1}$  with and without addition of  $1 \text{ mM}$  glucose.

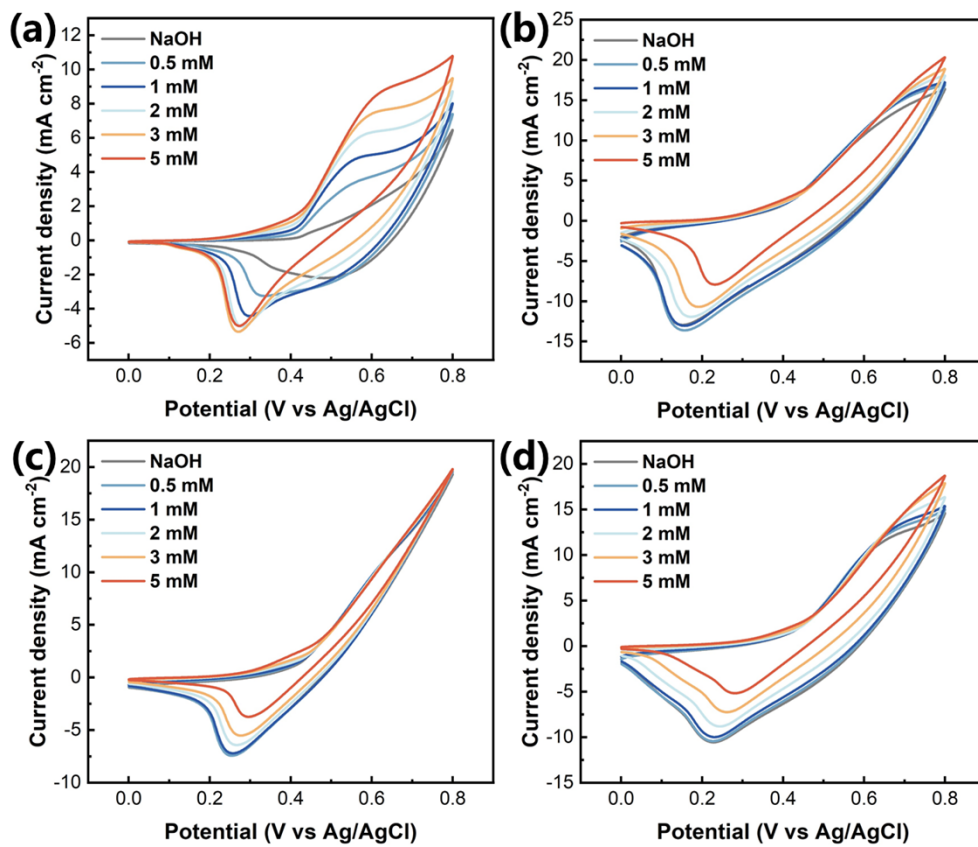

**Figure S8.** CV curves with addition of different concentration of glucose at scan rate of 10 mV s<sup>-1</sup>: (a) Ni(OH)<sub>2</sub>@NF, (b) NiO<sub>x</sub>/Ni(OH)<sub>2</sub>@NF, (c) (FeNi)O<sub>x</sub>/Ni(OH)<sub>2</sub>@NF, and (d) (CrNi)O<sub>x</sub>/Ni(OH)<sub>2</sub>@NF.

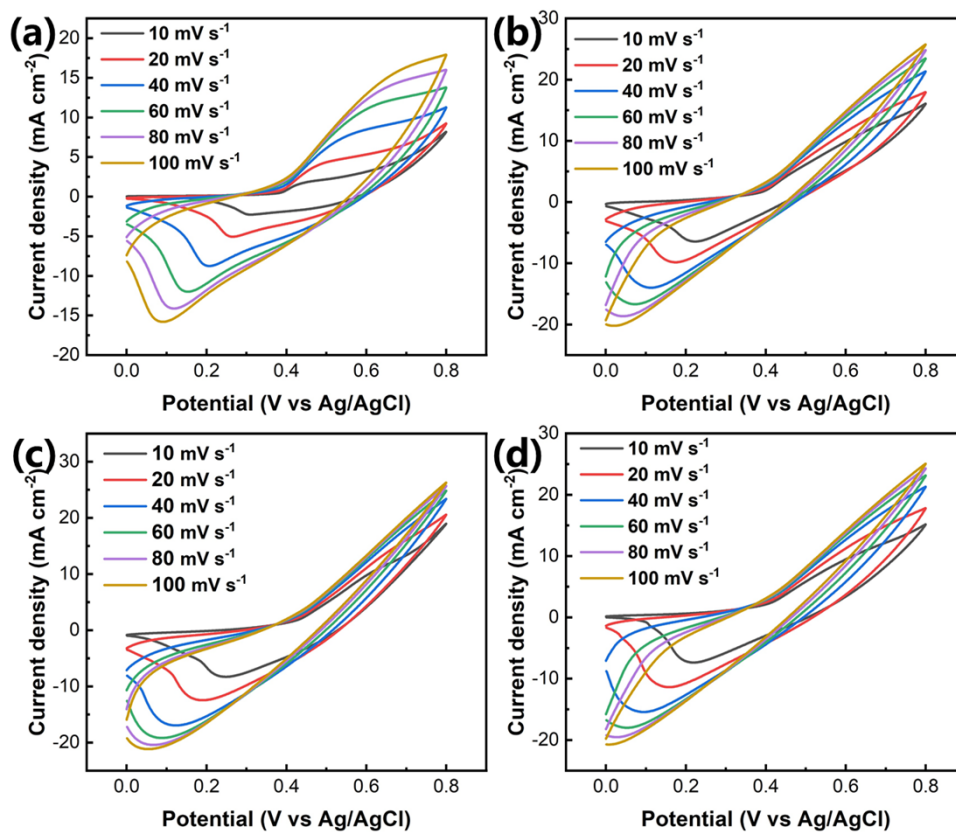

**Figure S9.** CV curves in a solution containing 0.1 M NaOH and 1 mM glucose with different scan rates ranging from 10 to 100 mV s<sup>-1</sup>: (a) Ni(OH)<sub>2</sub>@NF, (b) NiO<sub>x</sub>/Ni(OH)<sub>2</sub>@NF, (c) (FeNi)O<sub>x</sub>/Ni(OH)<sub>2</sub>@NF, and (d) (CrNi)O<sub>x</sub>/Ni(OH)<sub>2</sub>@NF.

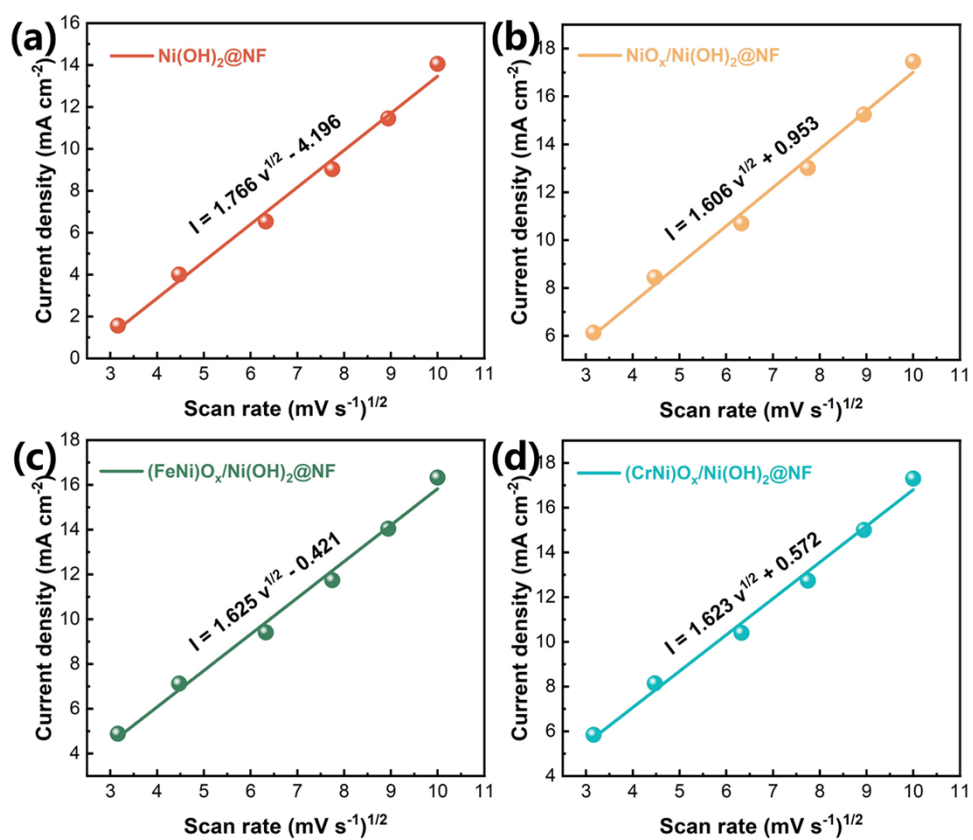

**Figure S10.** The current response versus the square root of the scan rate derived from the CV curves in Figure S8: (a)  $\text{Ni(OH)}_2@\text{NF}$ , (b)  $\text{NiO}_x/\text{Ni(OH)}_2@\text{NF}$ , (c)  $(\text{FeNi})\text{O}_x/\text{Ni(OH)}_2@\text{NF}$ , and (d)  $(\text{CrNi})\text{O}_x/\text{Ni(OH)}_2@\text{NF}$ .



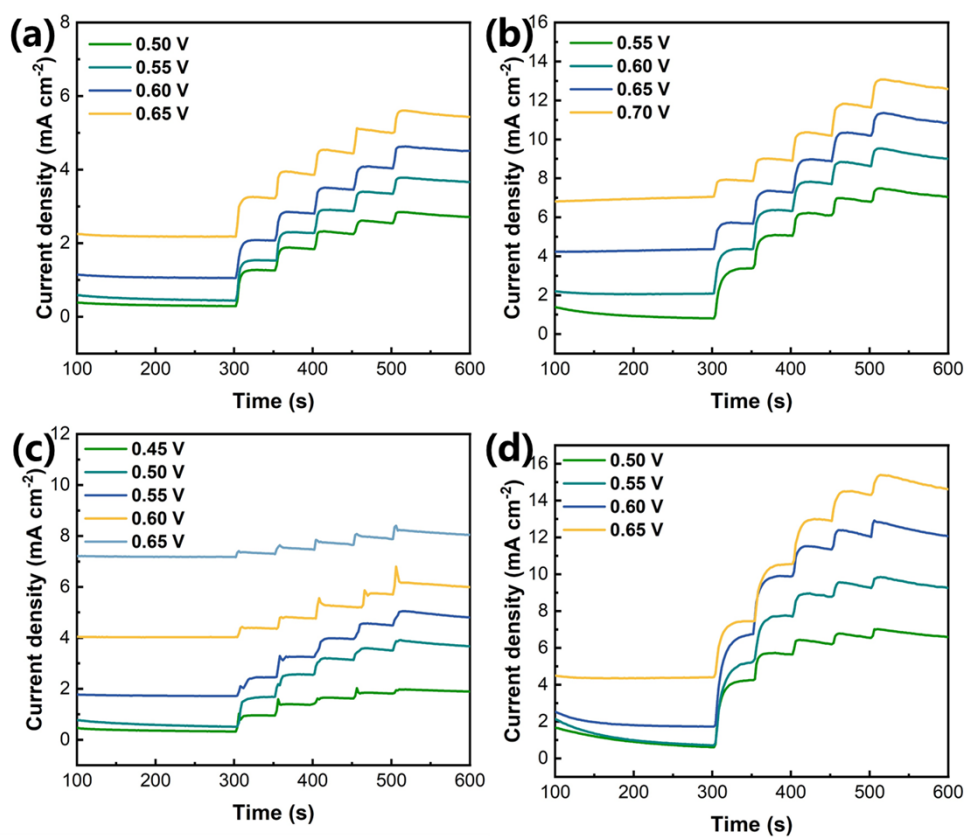

**Figure S11.** i-t curves at different voltages with incremental addition of 1 mM glucose:

(a) Ni(OH)<sub>2</sub>@NF, (b) NiO<sub>x</sub>/Ni(OH)<sub>2</sub>@NF, (c) (FeNi)O<sub>x</sub>/Ni(OH)<sub>2</sub>@NF, and (d) (CrNi)O<sub>x</sub>/Ni(OH)<sub>2</sub>@NF.

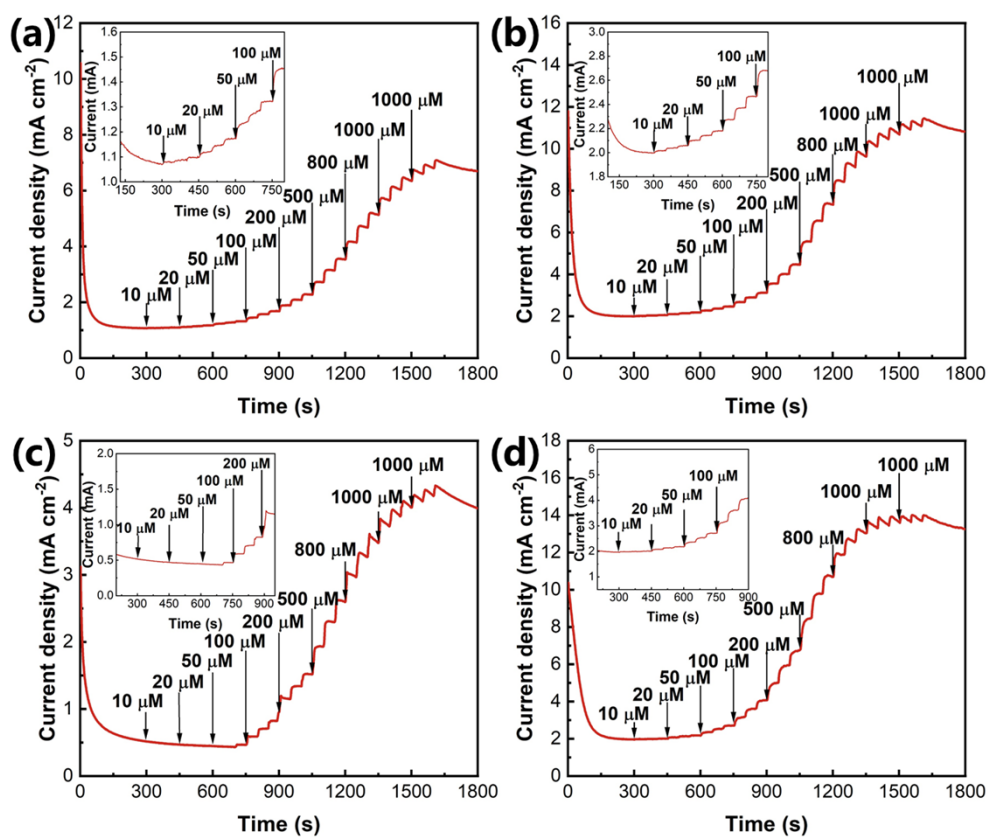

**Figure S12.** *i-t* curves with addition of different concentration of glucose: (a) Ni(OH)<sub>2</sub>@NF, (b) NiO<sub>x</sub>/Ni(OH)<sub>2</sub>@NF, (c) (FeNi)O<sub>x</sub>/Ni(OH)<sub>2</sub>@NF, and (d) (CrNi)O<sub>x</sub>/Ni(OH)<sub>2</sub>@NF.

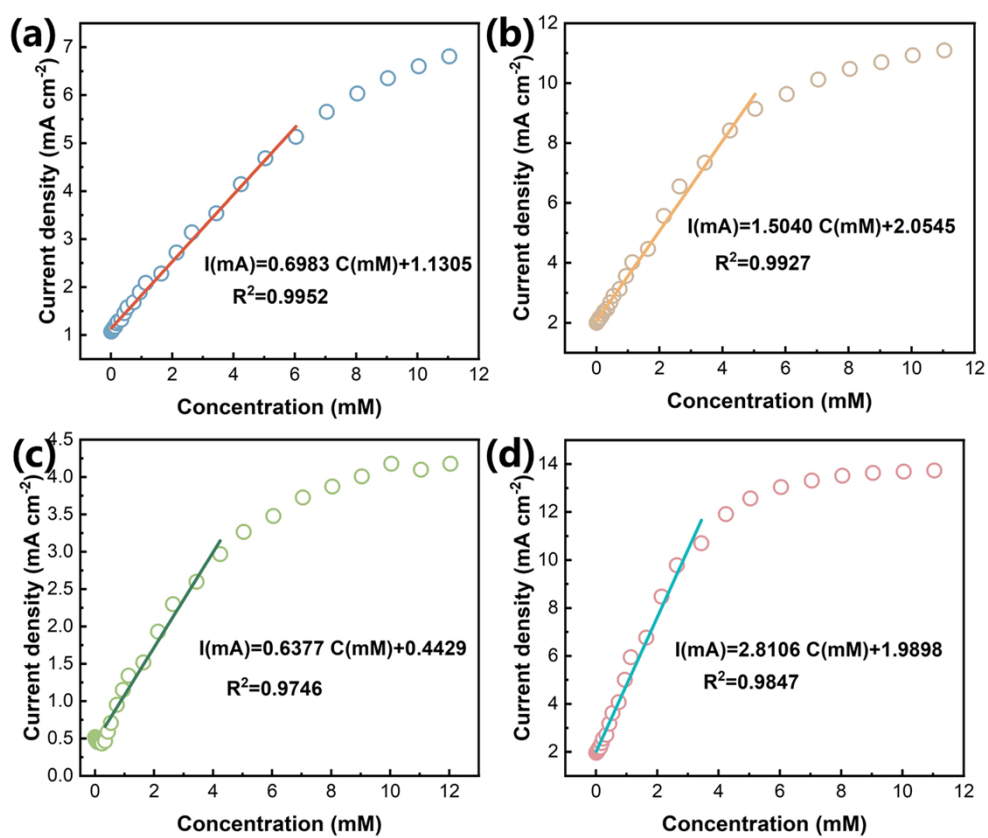

**Figure S13.** The corresponding concentration-current fitting curves derived from Figure S11: (a) Ni(OH)<sub>2</sub>@NF, (b) NiO<sub>x</sub>/Ni(OH)<sub>2</sub>@NF, (c) (FeNi)O<sub>x</sub>/Ni(OH)<sub>2</sub>@NF, and (d) (CrNi)O<sub>x</sub>/Ni(OH)<sub>2</sub>@NF.

**Table S1.** Sensing performances of electrocatalysts in recent literatures.

| Electrocatalysts                                 | Sensitivity                           | Linear range     | References                                                                                  |
|--------------------------------------------------|---------------------------------------|------------------|---------------------------------------------------------------------------------------------|
|                                                  | /mA mM <sup>-1</sup> cm <sup>-2</sup> | /mM              |                                                                                             |
| Pt/Au/BDD                                        | 1.7                                   | 0.01-7.5         | Biosensors and Bioelectronics<br>98 (2017) 76-82                                            |
| NiCoFe-LDH/FF                                    | 5.717                                 | 0.01-0.1         | Dalton Trans., 2023, 52, 16661-<br>16669                                                    |
| Hollow Ni(OH) <sub>2</sub> @CuS                  | 2.74                                  | 0.01-6.64        | Applied Surface Science 634<br>(2023) 157650                                                |
| NiCo-LDH@NI-NTNW                                 | 3.4                                   | ~1.05            | Journal of Colloid and Interface<br>Science 591 (2021) 384-395                              |
|                                                  | 4.6                                   | 1.05-2.52        | Sensors & Actuators: B.<br>Chemical 398 (2024) 134713                                       |
| MOF-derived CuO/CNT                              | 4.34                                  | 0.0005-0.1       | Journal of The Electrochemical<br>Society, 166 (16) B1732-B1741<br>(2019)                   |
| Ni(OH) <sub>2</sub> &NiOOH<br>film/Ni            | 5.7584                                | 0.001-0.13       | Colloids and Surfaces A:<br>Physicochemical and<br>Engineering Aspects 703 (2024)<br>135301 |
|                                                  |                                       |                  | Electrochimica Acta 299 (2019)<br>470-478                                                   |
| CuO nanowire array                               | 1.95                                  | 0.1-6            |                                                                                             |
| <b>(CoNi)O<sub>x</sub>/Ni(OH)<sub>2</sub>@NF</b> | <b>3.59</b>                           | <b>0.01-1.14</b> | <b>This work</b>                                                                            |

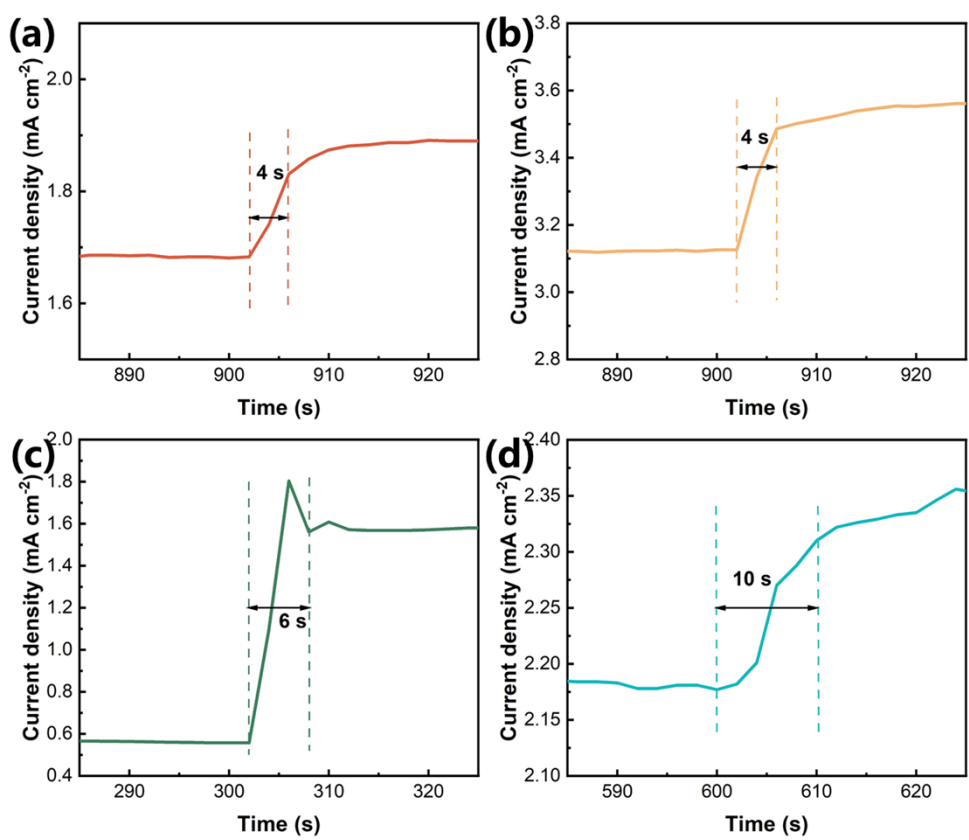

**Figure S14.** i-t curves with addition of 10 μM of glucose: (a) Ni(OH)<sub>2</sub>@NF, (b) NiO<sub>x</sub>/Ni(OH)<sub>2</sub>@NF, (c) (FeNi)O<sub>x</sub>/Ni(OH)<sub>2</sub>@NF, and (d) (CrNi)O<sub>x</sub>/Ni(OH)<sub>2</sub>@NF.

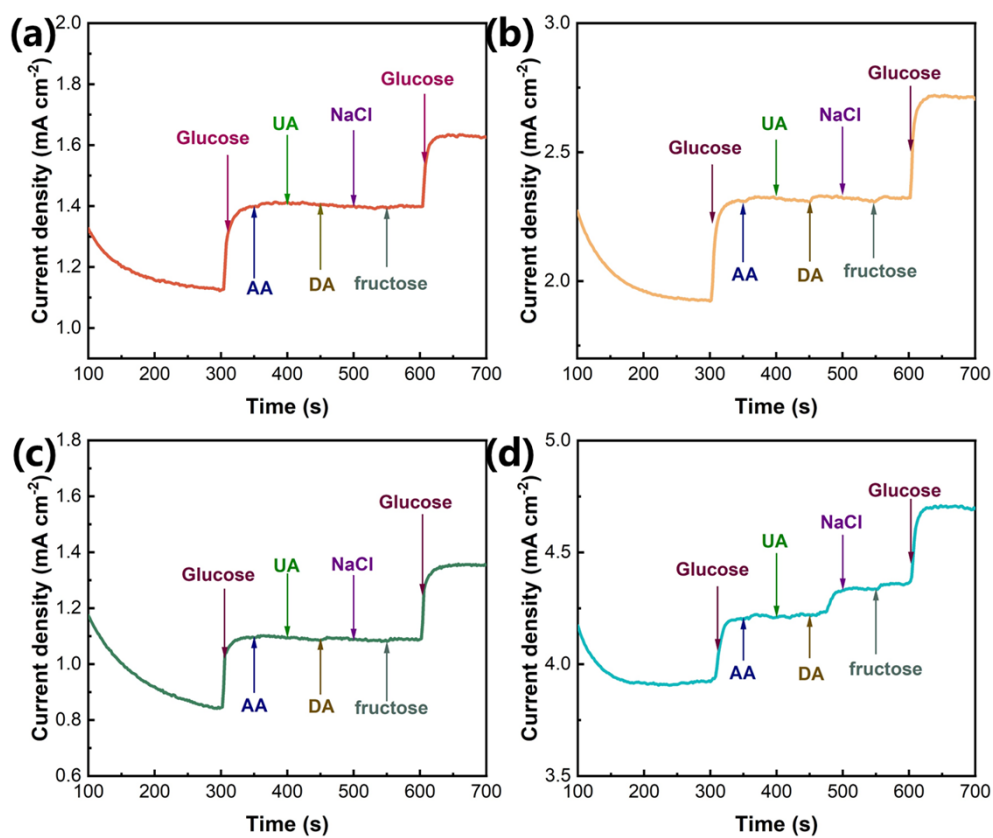

**Figure S15.** i-t curves with addition of with addition of glucose, AA, UA, DA, NaCl, and fructose: (a) Ni(OH)<sub>2</sub>@NF, (b) NiO<sub>x</sub>/Ni(OH)<sub>2</sub>@NF, (c) (FeNi)O<sub>x</sub>/Ni(OH)<sub>2</sub>@NF, and (d) (CrNi)O<sub>x</sub>/Ni(OH)<sub>2</sub>@NF.

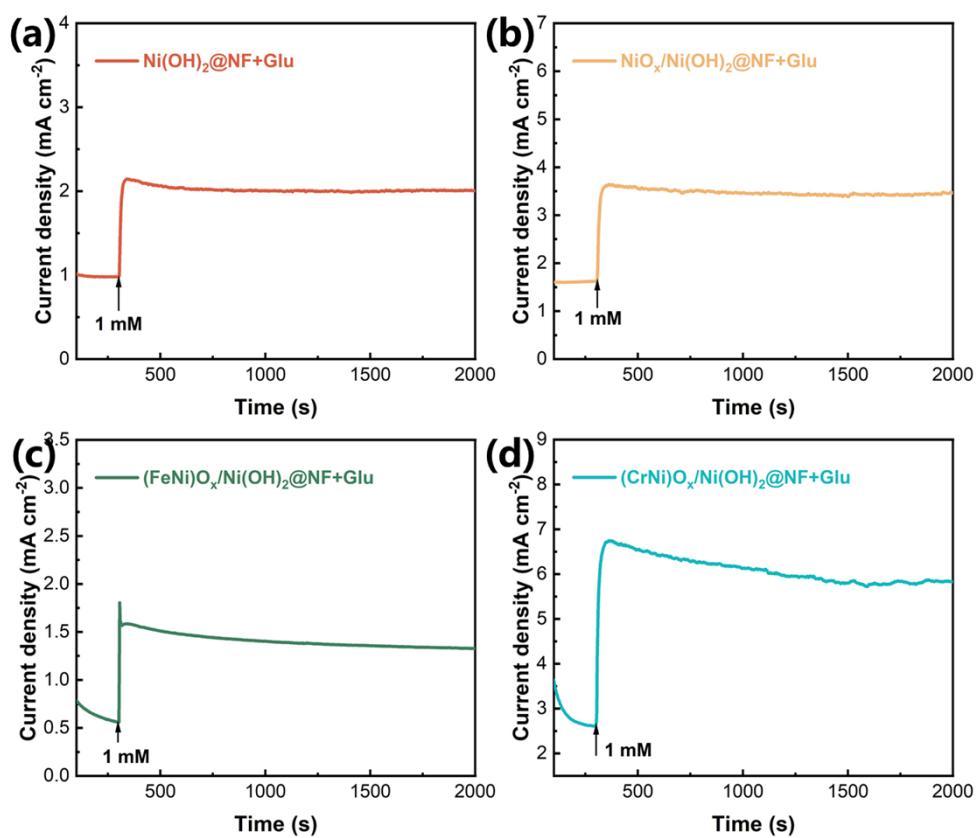

**Figure S16.** Long-term stability tests with addition of 1 mM glucose: (a)  $\text{Ni(OH)}_2@\text{NF}$ , (b)  $\text{NiO}_x/\text{Ni(OH)}_2@\text{NF}$ , (c)  $(\text{FeNi})\text{O}_x/\text{Ni(OH)}_2@\text{NF}$ , and (d)  $(\text{CrNi})\text{O}_x/\text{Ni(OH)}_2@\text{NF}$ .
